# Supplementary material
Source: Springer Nature journal article supplement (https://www.springermedizin.de/resource/supplementary/13229_2012_54_MOESM1_ESM.pdf/9676098)
Supplement: MOESM1 [file 9676098]

**Supplementary Material**

**Supplementary Table 1**

**Demographic characteristics of CHARGE participants with autism and typical development**

| Characteristic            | Samples for mtDNA deletions |     |               |     | Samples for mtDNA sequencing |     |               |     |
|---------------------------|-----------------------------|-----|---------------|-----|------------------------------|-----|---------------|-----|
|                           | AU<br>(n=67)                |     | TD*<br>(n=46) |     | AU<br>(n=10)                 |     | TD*<br>(n=10) |     |
|                           | Mean                        | SD  | Mean          | SD  | Mean                         | SD  | Mean          | SD  |
| Maternal age, y†          | 36.5                        | 4.4 | 35.5          | 5.1 | 37.1                         | 3.3 | 37.5          | 5.0 |
| Paternal age, y†          | 38.5                        | 5.3 | 38.1          | 5.7 | 40.1                         | 3.1 | 41.1          | 6.9 |
| Child's age, m†           | 45.1                        | 9.4 | 42.5          | 8.0 | 45.0                         | 7.7 | 46.0          | 5.8 |
|                           | %                           |     | %             |     | %                            |     | %             |     |
| Maternal education        |                             |     |               |     |                              |     |               |     |
| No Bachelor degree        | 51.0                        |     | 41.0          |     | 40.0                         |     | 10.0          |     |
| Bachelor degree or higher | 49.0                        |     | 59.0          |     | 60.0                         |     | 90.0          |     |
| Child's sex               |                             |     |               |     |                              |     |               |     |
| Male                      | 86.5                        |     | 87.2          |     | 90.0                         |     | 90.0          |     |
| Female                    | 13.5                        |     | 12.8          |     | 10.0                         |     | 10.0          |     |
| Child's birth year        |                             |     |               |     |                              |     |               |     |
| 1998-2001                 | 30.8                        |     | 38.5          |     | 40.0                         |     |               |     |
| 2002-2005                 | 69.2                        |     | 61.5          |     | 60.0                         |     | 100.0         |     |
| 2006-2007                 |                             |     |               |     |                              |     |               |     |
| Child's ethnicity         |                             |     |               |     |                              |     |               |     |
| White, non-Hispanic       | 46.2                        |     | 46.2          |     | 90.0                         |     | 40.0          |     |
| Non-White, non-Hispanic   | 11.5                        |     | 20.5          |     |                              |     | 40.0          |     |
| Hispanic                  | 42.3                        |     | 33.3          |     | 10.0                         |     | 20.0          |     |

\*includes 1 control who scored 112 total on Mullen's Scales of Early Development for whom the Vineland Adaptive Behavior Scales were not completed.

†Age at entry into CHARGE Study

**Supplementary Table 2**

**Clinical characteristics of CHARGE participants with autism and typical development**

| Assessment                       | Samples for mtDNA deletions |     |               |    | Samples for mtDNA sequencing |     |               |    |
|----------------------------------|-----------------------------|-----|---------------|----|------------------------------|-----|---------------|----|
|                                  | AU<br>(n=67)                |     | TD*<br>(n=46) |    | AU<br>(n=10)                 |     | TD*<br>(n=10) |    |
|                                  | Mean                        | SD  | Mean          | SD | Mean                         | SD  | Mean          | SD |
| ADI-R                            |                             |     |               |    |                              |     |               |    |
| Social Interaction Communication | 18.6                        | 4.6 |               |    | 17.3                         | 4.7 |               |    |
| Verbal                           | 15.5                        | 2.7 |               |    | 14.6                         | 2.4 |               |    |
| Non-Verbal                       | 10.7                        | 2.1 |               |    | 10.7                         | 1.2 |               |    |
| Stereotyped Behaviors            | 6.5                         | 2.2 |               |    | 7.0                          | 1.4 |               |    |

|                     |      |      |       |      |      |      |       |      |
|---------------------|------|------|-------|------|------|------|-------|------|
| ADOS Module 1       |      |      |       |      |      |      |       |      |
| Communication       | 5.7  | 1.3  |       |      | 4.7  | 1.2  |       |      |
| Social Interaction  | 9.8  | 1.8  |       |      | 9.3  | 1.5  |       |      |
| ADOS Module 2       |      |      |       |      |      |      |       |      |
| Communication       | 6.5  | 1.5  |       |      | 6.0  | 1.2  |       |      |
| Social Interaction  | 9.5  | 1.5  |       |      | 9.4  | 0.5  |       |      |
| ADOS Module 3       |      |      |       |      |      |      |       |      |
| Communication       | 2.0  |      |       |      |      |      |       |      |
| Social Interaction  | 9.0  |      |       |      |      |      |       |      |
| Mullen              |      |      |       |      |      |      |       |      |
| Visual Reception    | 29.7 | 13.2 | 56.2  | 11.0 | 37.0 | 17.1 | 60.0  | 8.4  |
| Fine Motor          | 28.0 | 11.9 | 53.0  | 12.4 | 34.9 | 18.1 | 52.6  | 16.2 |
| Receptive Language  | 26.9 | 11.5 | 50.6  | 12.9 | 31.0 | 13.0 | 55.3  | 14.3 |
| Expressive Language | 26.5 | 10.8 | 52.5  | 11.8 | 31.1 | 9.8  | 52.1  | 12.5 |
| Composite           | 61.3 | 18.1 | 106.2 | 18.1 | 70.7 | 20.7 | 110.0 | 20.4 |
| SCQ                 |      |      | 2.8   | 2.5  |      |      | 2.6   | 3.1  |
| Vineland            |      |      |       |      |      |      |       |      |
| Communication       | 68.4 | 17.4 | 104.5 | 14.1 | 81.9 | 22.2 | 106.7 | 13.6 |
| Daily Living Skills | 64.5 | 11.0 | 101.6 | 13.6 | 74.8 | 14.3 | 94.1  | 14.3 |
| Socialization       | 67.8 | 12.6 | 105.6 | 14.4 | 76.2 | 14.0 | 98.8  | 9.6  |
| Motor Skills        | 72.8 | 17.2 | 105.9 | 14.9 | 84.6 | 17.2 | 104.8 | 17.1 |
| Composite           | 63.6 | 13.8 | 105.8 | 14.8 | 75.5 | 18.0 | 101.4 | 16.4 |

\*includes 1 control who scored 112 total on Mullen's Scales of Early Development for whom the Vineland Adaptive Behavior Scales were not completed.

**Supplementary Table 3: mtDNA sequence variants in PBMC from children with typical autism**

| Case number | Base position | Protein | Nucleotide change | Amino acid change | mtDNA Base Substitution Diseases | Polymorphism* |
|-------------|---------------|---------|-------------------|-------------------|----------------------------------|---------------|
| 1           | 8269          | COX2    | G → A             | nc (Ter-Ter)      |                                  | 1.37%         |
|             | 14927         | CYTB    | A → G             | T-A               |                                  | 0.55%         |
| 2           | <b>3197</b>   | RNR2    | T → C             | nc (rRNA 16S)     | (G3196A ADPD)                    | 3.60%         |
|             | <b>9477</b>   | COX3    | G → A             | V-I**             | Thyroid tumor                    | 3.60%         |
|             | 9548          | COX3    | G → A             | syn               |                                  | 0.96%         |
| 3           | 3480          | ND1     | A → G             | syn               | Prostate tumor                   | 4.84%         |
|             | 3552          | ND1     | T → C             | syn               |                                  | 0.15%         |
|             | 9055          | ATP6    | G → A             | A-T**             | PD protective factor [1]         | 4.96%         |
|             | 9698          | COX3    | T → C             | syn               |                                  | 5.10%         |
| 4           | <u>8697</u>   | ATP6    | G → A             | syn               | Thyroid tumor                    | 4.7%          |
|             | <u>14905</u>  | CYTB    | G → A             | syn               |                                  | 5.1%          |
| 5           | <b>4491</b>   | ND2     | G → A             | V-I               |                                  | 0.67%         |
| 6           | <b>3197</b>   | RNR2    | T → C             | nc (rRNA 16S)     | (G3196A ADPD)                    | 3.60%         |

|   |             |      |       |                   |                                                                                 |  |       |
|---|-------------|------|-------|-------------------|---------------------------------------------------------------------------------|--|-------|
|   | 9031        | ATP6 | C → T | 16S)<br>L(2)-L(1) |                                                                                 |  | NR    |
|   | <b>9477</b> | COX3 | G → A | V-I**             | Thyroid tumor                                                                   |  | 3.60% |
| 7 | 8765        | ATP6 | C → T | A-V               |                                                                                 |  | NR    |
| 8 | <b>4491</b> | ND2  | G → A | V-I               |                                                                                 |  | 0.67% |
|   | <u>4580</u> | ND2  | G → A | syn               | Pancreatic cancer cell line                                                     |  | 2.84% |
|   | 5195        | ND2  | C → T | syn               |                                                                                 |  | NR    |
| 9 | 3394        | ND1  | T → C | Y-H               | LHON, NIDDM, CPT deficiency; acute leukemia platelets, leukocytes & bone marrow |  | 1.46% |

All sequence variants were homoplasmic. \*From [2] and MITOMAP database[3]; NR never reported in any of these databases. \*\* Natural amino acid variants (from Expsy database). Numbers in bold are present more than once in cases. Underlined numbers represent somatic mutations also present in TD. Abbreviations: nc, noncoding; ADPD, Alzheimer's disease and Parkinson's disease; CPT, carnitine palmitoyl-transferase II (CPT II) deficiency; LHON, Leber hereditary optic neuropathy; NIDDM, Non-insulin dependent diabetes mellitus; PD, Parkinson's disease. Case 10 resulted identical to the reference sequence, and it was excluded from the Table.

**Supplementary Table 4: mtDNA sequence variants in PBMC from typical neurodeveloping children**

| Case number | Base position | Protein | Nucleotide change | Amino acid change | mtDNA Substitution Diseases         | Base  | Polymorphism* |
|-------------|---------------|---------|-------------------|-------------------|-------------------------------------|-------|---------------|
| 1           | <u>4580</u>   | ND2     | G → A             | syn               | Pancreatic cancer cell line         |       | 2.84%         |
|             | 4917*         | ND2     | A → G             | N-D               | LHON/Insulin Resistance/AMD/NRTI-PN |       | 4.78%         |
|             | 5147          | ND2     | G → A             | syn               |                                     |       | 4.99%         |
|             | <u>8697</u>   | ATP6    | G → A             | syn               | Thyroid tumor                       |       | 4.7%          |
| 2           | 8744          | ATP6    | T → C             | V-A               |                                     |       | NR            |
| 3†          | 3547          | ND1     | A → G             | I-V               |                                     |       | 0.81%         |
|             | 4977          | ND2     | T → C             | syn               |                                     |       | 0.74%         |
|             | 9097          | ATP6    | A → G             | I-V**             |                                     |       | 0.04%, NR     |
| 4           | 3398          | ND1     | T → C             | M-T               | D MDF+HCM/GDM/possibly associated   | LVNC- | 0.18%         |
|             | 3447          | ND1     | A → G             | syn               |                                     |       | 0.44%         |
|             | 3990          | ND1     | C → T             | syn               |                                     |       | 0.41%         |

|   |              |      |       |       |                |           |
|---|--------------|------|-------|-------|----------------|-----------|
|   | <b>4529</b>  | ND2  | A → T | syn   |                | 1.22%     |
|   | 8107         | COX2 | A → G | syn   |                | NR        |
|   | <b>8251</b>  | COX2 | G → A | syn   |                | 5.3%      |
|   | <b>15043</b> | CYTB | G → A | syn   | MDD-associated | 28.7%     |
| 5 | 3316         | ND1  | G → A | A-T   | NIDDM/LHON/PEO | 0.78%     |
|   | 3453         | ND1  | C → T | syn   |                | R         |
|   | 3465         | ND1  | A → T | M-I   |                | R         |
|   | 4167         | ND1  | C → T | syn   |                | 0.07%     |
|   | 8701         | ATP6 | A → G | T-A** | Thyroid tumor  | 34.5%     |
|   | 9540         | COX3 | T → C | syn   |                | 34.9%     |
|   | 9545         | COX3 | A → G | syn   |                | 2.0%      |
|   | <b>15043</b> | CYTB | G → A | syn   | MDD-associated | 28.7%     |
|   | 15109        | CYTB | T → C | syn   |                | 0.04%, NR |
|   | 15301        | CYTB | G → A | syn   |                | 32.0%     |
| 6 | <b>4529</b>  | ND2  | A → T | syn   |                | 1.22%     |
|   | 8155         | COX2 | G → A | syn   |                | 0.18%     |
|   | <b>8251</b>  | COX2 | G → A | syn   |                | 5.3%      |
|   | 15003        | CYTB | G → C | G-A   |                | NR        |
|   | <b>15043</b> | CYTB | G → A | syn   | MDD-associated | 28.7%     |
| 7 | 15212        | CYTB | A → G | I-V   |                | 0.04%     |
|   | 15218        | CYTB | A → G | T-A   |                | 1.4%      |
| 8 | <u>14905</u> | CYTB | G → A | syn   |                | 5.1%      |
| 9 | 4646         | ND2  | T → C | syn   | Glioblastoma   | 0.56%     |

All mutations were homoplasmic. \*From [2]. † This sample contained in addition a 9 bp deletion from nt 8281 to 8289 (A[delCCCCCTCTA]G) consistent with haplogroup B according to [3]. For this same case, the nucleotide change was reported as a polymorphism in one database but not reported in MITOMAP. Numbers in bold are present more than once in TD. Underlined numbers represent somatic mutations also present in AU. \*\* Natural amino acid variants (from Expassy database). NR, not reported in any mitochondrial database. R, reported in MITOMAP but not in ref. [2]. Abbreviations: AMD, age-related macular degeneration; DMDF, diabetes mellitus & deafness; GDM, gestational DM; HCM, hypertrophic cardiomyopathy; LVNC, left ventricular noncompaction; MDD, major depressive disorder; NRTI-PN, antiretroviral therapy-associated peripheral neuropathy. Case 10 sequence was identical to the reference one. \*haplogroup T marker.

## REFERENCES

1. van der Walt JM, Nicodemus KK, Martin ER, Scott WK, Nance MA, Watts RL, Hubble JP, Haines JL, Koller WC, Lyons K, et al: **Mitochondrial polymorphisms significantly reduce the risk of Parkinson disease**. *American journal of human genetics* 2003, **72**:804-811.

2. Ingman M, Gyllensten U: **mtDB: Human Mitochondrial Genome Database, a resource for population genetics and medical sciences.** *Nucl Acids Res* 2006, **34**:D749-751.
3. Brandon MC, Lott MT, Nguyen KC, Spolim S, Navathe SB, Baldi P, Wallace DC: **MITOMAP: a human mitochondrial genome database--2004 update.** *Nucleic Acids Res* 2005, **33**:D611-613.
